# Supplementary material for: 人才发展战略论文选（三）－－城市现代化与环卫人才结构优化
Source: MDPI journal article supplement (doi:10.3390/molecules27206833), 1999-01-01
Supplement: s1 [file s1]

## Supporting Information

### **ZnO/boron nitride quantum dots nanocomposites for the enhanced photocatalytic degradation of methylene blue and methyl orange**

Di Liu<sup>†</sup>, Jinu Song<sup>†</sup>, Jin Suk Chung, Seung Hyun Hur\*, Won Mook Choi\*

*School of Chemical Engineering, University of Ulsan, 93 Daehak-ro Nam-gu, Ulsan 44610, Korea*

<sup>†</sup>These authors contributed equally to this work.

\*Corresponding author.

Tel.: +82 52 259 1065, fax: +82 52 259 1689

E-mail addresses: [shhur@ulsan.ac.kr](mailto:shhur@ulsan.ac.kr) (S.H. Hur)

[wmchoi98@ulsan.ac.kr](mailto:wmchoi98@ulsan.ac.kr) (W.M. Choi)

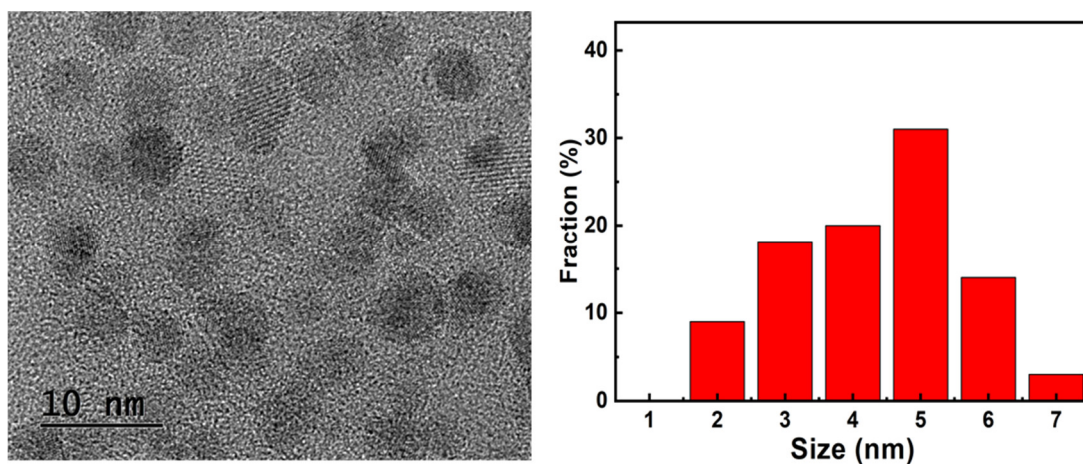

**Figure S1.** HRTEM image and the size distribution of the synthesized BNQDs.

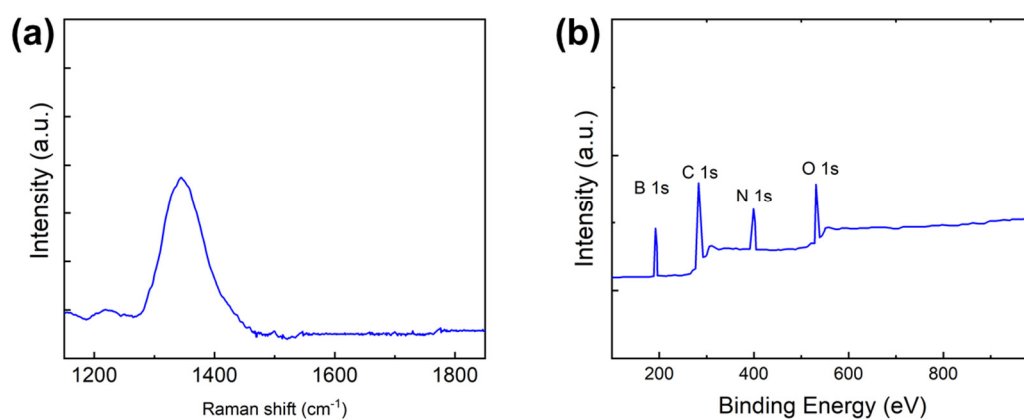

**Figure S2.** (a) Raman spectrum and (b) XPS survey scan of BNQDs.

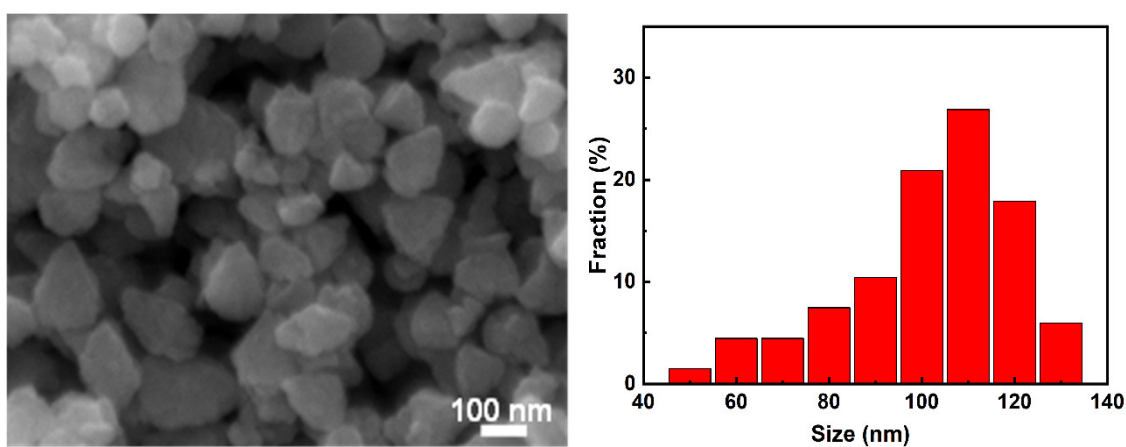

**Figure S3.** FESEM image and the size distribution of the synthesized ZnO particles.

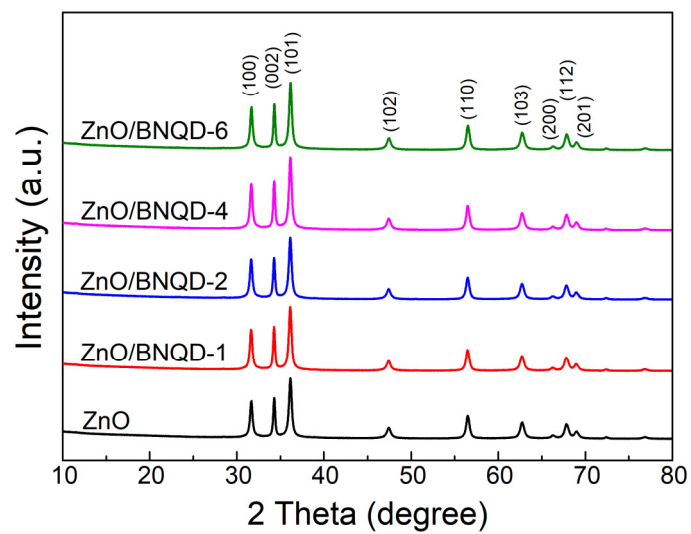

**Figure S4.** XRD patterns of ZnO and ZnO/BNQD nanocomposites.

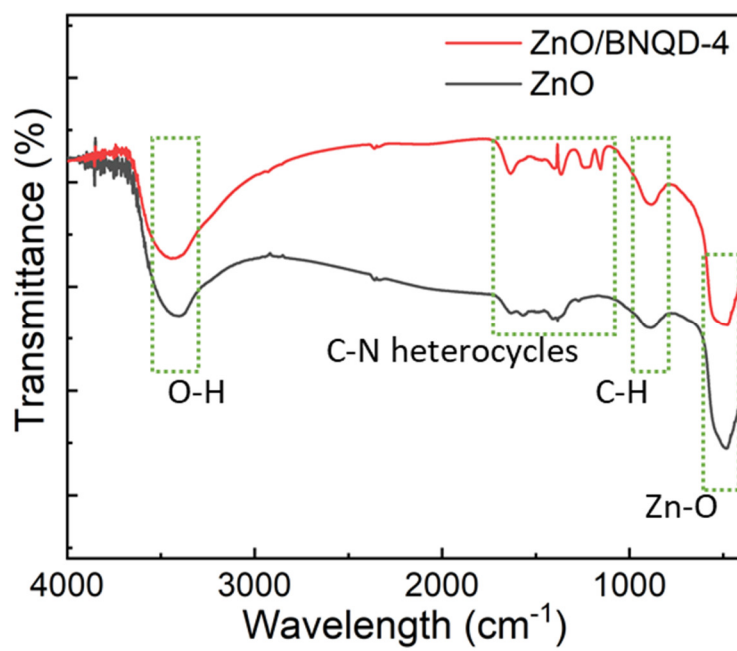

**Figure S5.** FTIR spectra of ZnO and ZnO/BNQD-4 nanocomposite.

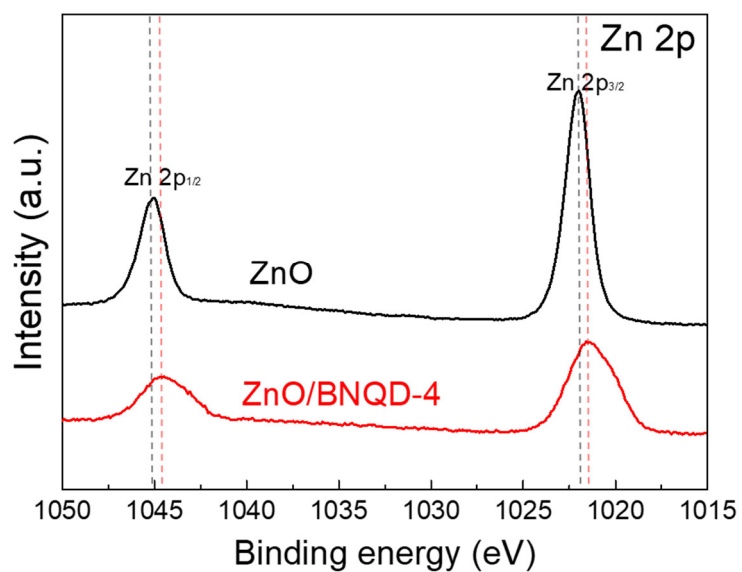

**Figure. S6.** High resolution XPS spectra of Zn 2p for ZnO and ZnO/BNQD-4 nanocomposite.

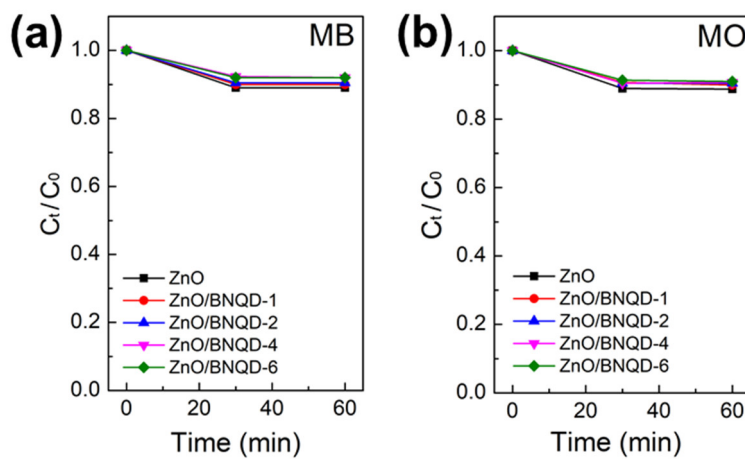

**Figure S7.** The adsorption equilibrium for ZnO and ZnO/BNQD-4 nanocomposite in (a) MB and (b) MO.

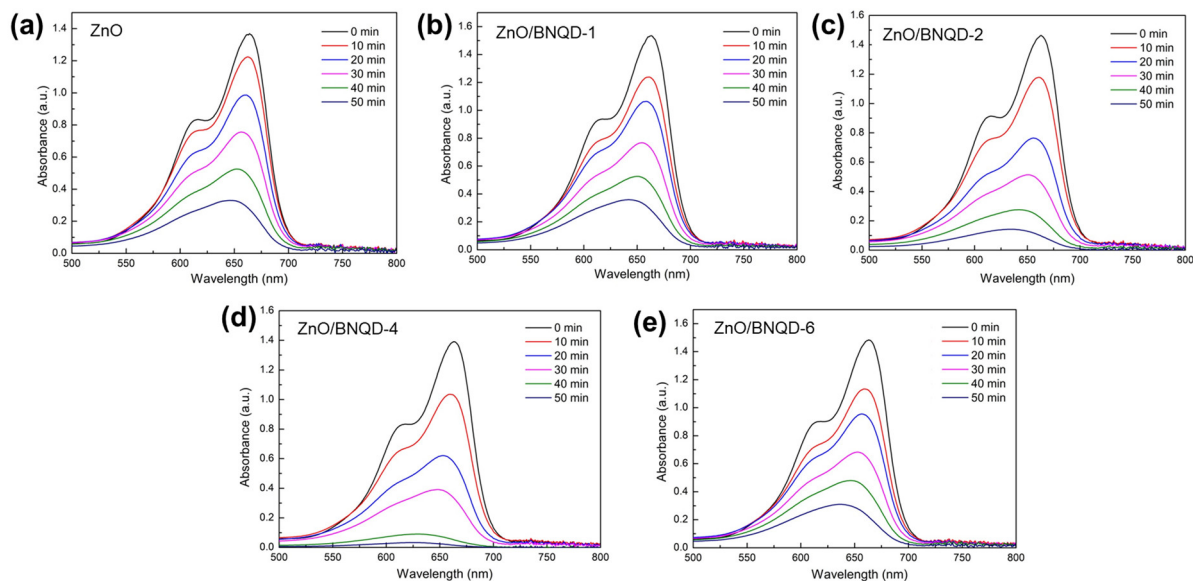

**Figure S8.** UV-vis spectra of MB solution with (a) ZnO and (b-e) ZnO/BNQD nanocomposites at different irradiation times.

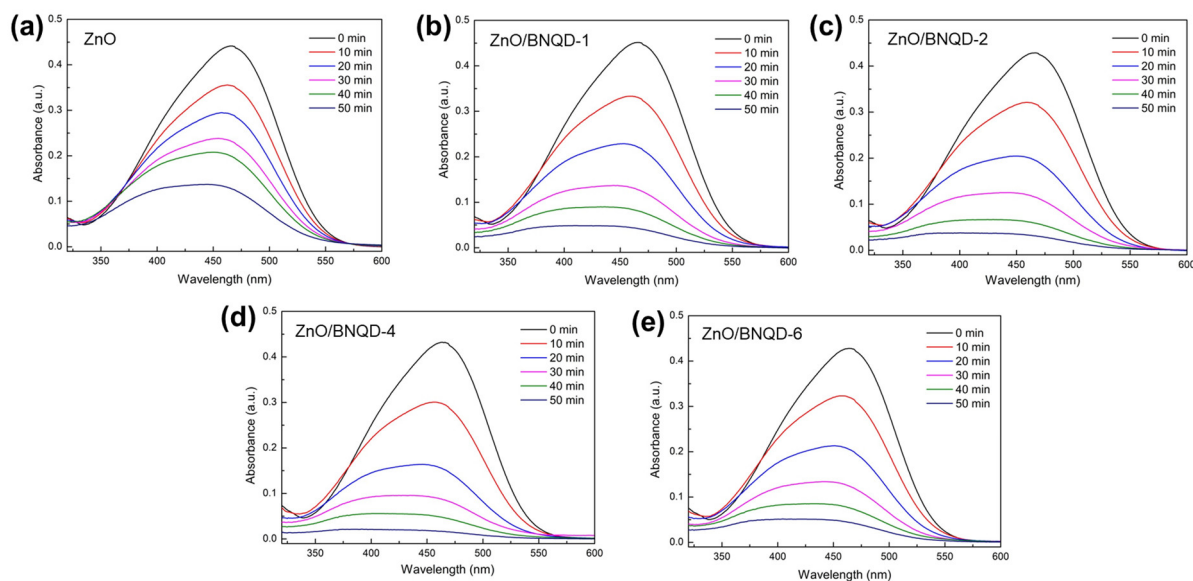

**Figure S9.** UV-vis spectra of MO solution with (a) ZnO and (b-e) ZnO/BNQD nanocomposites at different irradiation times.

Table S1. Photocatalytic activities comparison for the degradation of MB with ZnO based composites under UV light irradiation.

| Sample                                    | Catalyst dosage<br>(g/L) | Light source       | Irradiation<br>time | MB degradation<br>(%) | Rate constant<br>(min <sup>-1</sup> ) | Ref.      |
|-------------------------------------------|--------------------------|--------------------|---------------------|-----------------------|---------------------------------------|-----------|
| N-doped ZnO/C <sub>3</sub> N <sub>4</sub> | 0.5 g/L                  | 300W Xe lamp       | 100 min             | 90%                   | 0.0299                                | [1]       |
| Ag/ZnO                                    | 0.6 g/L                  | 6W UV lamp         | 60 min              | 87.74%                | 0.032                                 | [2]       |
| ZnO/Eu                                    | 1 g/L                    | 300W Osram Vitalux | 150 min             | 90%                   | -                                     | [3]       |
| N-ZnO/C <sub>3</sub> N <sub>4</sub>       | 1 g/L                    | 300W Xe lamp       | 90 min              | 95%                   | 0.030                                 | [4]       |
| AgBr/g-C <sub>3</sub> N <sub>4</sub> /ZnO | 0.4 g/L                  | 300W Xe lamp       | 80 min              | 96.3%                 | 0.041                                 | [5]       |
| N self doped ZnO                          | 0.5 g/L                  | 200W Xe lamp       | 80 min              | 95.3%                 | 0.040                                 | [6]       |
| ZnO/BNQD                                  | 1 g/L                    | 20W Sigma 4 BLB    | 40 min              | 96.4%                 | 0.0776                                | This work |

Table S2. Photocatalytic activities comparison for the degradation of MO with ZnO based composites under UV light irradiation.

| Sample                              | Catalyst dosage<br>(g/L) | Light source        | Irradiation<br>time | MO degradation<br>(%) | Rate constant<br>(min <sup>-1</sup> ) | Ref.      |
|-------------------------------------|--------------------------|---------------------|---------------------|-----------------------|---------------------------------------|-----------|
| ZnO/Eu                              | 1.0 g/L                  | 300 W Osram Vitalux | 60 min              | 95%                   | -                                     | [3]       |
| Graphene/ZnO                        | 0.5 g/L                  | Natural sunlight    | 150 min             | 100%                  | 0.035                                 | [7]       |
| Ag-N-ZnO                            | 0.2 g/L                  | 500 W Xe lamp       | 120 min             | 98.82%                | 0.026                                 | [8]       |
| ZnO/SnO <sub>2</sub>                | 0.2 g/L                  | 300 W Hg lamp       | 100 min             | 56%                   | -                                     | [9]       |
| Cu-TiO <sub>2</sub> /ZnO            | 1.0 g/L                  | 500 W Xe lamp       | 60 min              | 83%                   | 0.0306                                | [10]      |
| ZnO/g-C <sub>3</sub> N <sub>4</sub> | 2.5 g/L                  | 500 W Xe lamp       | 120 min             | 98%                   | 0.136                                 | [11]      |
| ZnO/BNQD                            | 1.0 g/L                  | 20W Sigma 4 BLB     | 50 min              | 97.9%                 | 0.0666                                | This work |

## References

- [1] Balcha, A.; Yadav, O.P.; Dey, T. Photocatalytic degradation of methylene blue dye by zinc oxide nanoparticles obtained from precipitation and sol–gel methods. *Environ. Sci. Pollut. Res.* **2016**, *23*, 25485–25493.
- [2] Rafaie, H.A.; Nor, R.M.; Azmina, M.S.; Ramli, N.I.T.; Mohamed, R. Decoration of ZnO microstructures with Ag nanoparticles enhanced the catalytic photodegradation of methylene blue dye. *J. Environ. Chem. Eng.* **2017**, *5*, 3963–3972.
- [3] Trandafilović, L.V.; Jovanović, D.J.; Zhang, X.; Ptasińska, S.; Dramićanin, M.D. Enhanced photocatalytic degradation of methylene blue and methyl orange by ZnO:Eu nanoparticles. *Appl. Catal. B: Environ.* **2017**, *203*, 740–752.
- [4] Liu, Y.; Liu, H.; Zhou, H.; Li, T.; Zhang, L. A Z-scheme mechanism of N-ZnO/g-C<sub>3</sub>N<sub>4</sub> for enhanced H<sub>2</sub> evolution and photocatalytic degradation. *Appl. Surf. Sci.* **2019**, *466*, 133–140.
- [5] Azimi, E.B.; Badieli, A.; Sadr, M.H. Dramatic visible photocatalytic performance of g-C<sub>3</sub>N<sub>4</sub>-based nanocomposite due to the synergistic effect of AgBr and ZnO semiconductors. *J. Phys. Chem. Solids.* **2018**, *122*, 174–183.
- [6] Sun, L.; Shao, Q.; Zhang, Y.; Jiang, H.Y.; Ge, S.S.; Lou, S.Q.; Lin, J.; Zhang, J.X.; Wu, S.D.; Dong, M.Y.; Guo, Z.H. N self-doped ZnO derived from microwave hydrothermal synthesized zeolitic imidazolate framework-8 toward enhanced photocatalytic degradation of methylene blue. *J. Colloid Interface Sci.* **2020**, *565*, 142–155.
- [7] Wang, L.; Li, Z.; Chen, J.; Huang, Y.; Zhang, H.; Qui, H. Enhanced photocatalytic degradation of methyl orange by porous graphene/ZnO nanocomposite. *Environ. Pollut.* **2019**, *249*, 801–811.
- [8] Chen, X.; Wu, Z.; Gao, Z.; Ye, B.C. Effect of different activated carbon as carrier on the photocatalytic activity of Ag-N-ZnO photocatalyst for methyl orange degradation under visible light irradiation. *Nanomaterials* **2017**, *7*, 258.
- [9] Ali, W.; Ullah, H.; Zada, A.; Alamgir, M.K.; Muhammad, W.; Ahmad, M.J.; Nadhman, A. Effect of calcination temperature on the photoactivities of ZnO/SnO<sub>2</sub> nanocomposites for the degradation of methyl orange. *Mater. Chem. Phys.* **2018**, *213*, 259–266.
- [10] Dorraj, M.; Alizadeh, M.; Sairi, A.; Basirun, W.; Goh, B.T.; Woi, P.; Alias, Y. Enhanced Visible Light Photocatalytic Activity of Copper-doped Titanium Oxide–Zinc Oxide Heterojunction for Methyl Orange Degradation. *Appl. Surf. Sci.* **2017**, *414*, 251–261.
- [11] Guan, R.; Li, J.; Zhang, J.; Zhao, Z.; Wang, D.; Zhai, H.; Sun, D. Photocatalytic Performance and Mechanistic Research of ZnO/g-C<sub>3</sub>N<sub>4</sub> on Degradation of Methyl Orange. *ACS omega* **2019**, *4*, 20742–20747.
